1                    **A PCR amplicon–based SARS-CoV-2 replicon for antiviral screening**

2

3 Tomohiro Kotaki<sup>a\*</sup>, Xuping Xie<sup>b</sup>, Pei-Yong Shi<sup>b</sup>, Masanori Kameoka<sup>a\*</sup>

4

5 <sup>a</sup>Department of Public Health, Kobe University Graduate School of Health Sciences, Japan

6 <sup>b</sup>Department of Biochemistry & Molecular Biology, University of Texas Medical Branch,

7 Galveston, TX, USA

8

9                    **Correspondence:**

10 Department of Public Health, Kobe University Graduate School of Health Sciences, Japan

11 Tomohiro Kotaki: [tkotaki@peopole.kobe-u.ac.jp](mailto:tkotaki@peopole.kobe-u.ac.jp)

12 Masanori Kameoka: [mkameoka@port.kobe-u.ac.jp](mailto:mkameoka@port.kobe-u.ac.jp)

13

14                    **Running title:**

15 A SARS-CoV-2 replicon for antiviral screening

16

17                    **Key words:**

18 SARS-CoV-2, replicon, antiviral screening

19

20 **Abstract**

21 The development of specific antiviral compounds to SARS-CoV-2 is an urgent task. One of  
22 the obstacles for the antiviral development is the requirement of biocontainment because  
23 infectious SARS-CoV-2 must be handled in a biosafety level-3 laboratory.  
24 Replicon, a non-infectious self-replicative viral RNA, could be a safe and effective tool for  
25 antiviral screening; however, SARS-CoV-2 replicon has not been reported yet. Herein, we  
26 generated a PCR-based SARS-CoV-2 replicon. Eight fragments covering the entire SARS-  
27 CoV-2 genome except S, E, and M genes were amplified with HiBiT-tag sequence by PCR.  
28 The amplicons were ligated and *in vitro* transcribed to RNA. The cells electroporated with  
29 the replicon RNA showed more than 3,000 times higher luminescence than MOCK control  
30 cells at 24 hours post-electroporation, indicating robust viral translation and RNA replication.  
31 The replication was drastically inhibited by remdesivir, an RNA polymerase inhibitor for  
32 SARS-CoV-2. The  $IC_{50}$  of remdesivir in this study was 0.29  $\mu$ M, generally consistent to the  
33  $IC_{50}$  obtained using infectious SARS-CoV-2 in a previous study (0.77  $\mu$ M). Taken together,  
34 this system could be applied to the safe and effective antiviral screening without using  
35 infectious SARS-CoV-2. Because this is a transient replicon, further improvement including  
36 the establishment of stable cell line must be achieved.

## 37 **Introduction**

38           Severe acute respiratory syndrome-coronavirus 2 (SARS-CoV-2) has been causing a  
39 catastrophic pandemic worldwide. The symptoms of SARS-CoV-2 infection (coronavirus  
40 disease 2019 [COVID-19]) ranges from asymptomatic to fever, acute respiratory distress,  
41 pneumonia, and ultimately death [1]. To date, several antiviral drugs such as remdesivir (viral  
42 RNA-dependent RNA polymerase [RdRp] inhibitor for Ebola virus) have been repurposed  
43 for COVID-19 therapy [2]. Nevertheless, the mortality was still high (above 5%) [3].  
44 Therefore, it is important to develop antiviral agents that can specifically inhibit the  
45 propagation of SARS-CoV-2.

46           One of the obstacles for the antiviral screening of SARS-CoV-2 is biosafety concern.  
47 The high infectivity and mortality of SARS-CoV-2 have rendered antiviral screening difficult.  
48 Because SARS-CoV-2 was classified as a biosafety level-3 (BSL-3) pathogen, it must be  
49 handled in a BSL-3 laboratory. The construction of a safe and high throughput antiviral  
50 screening system has been coveted.

51           The replicon system could be a useful tool for safe and efficient antiviral screening.  
52 Replicon is a non-infectious, self-replicative RNA that lacks the viral structural genes and  
53 retains the genes necessary for RNA replication [4,5]. Because the replicon lacks viral  
54 structural genes, infectious virions are not produced from the transfected cell, thus reducing  
55 the biosafety concern. Additionally, the insertion of reporter gene into the replicon genome  
56 enables us to easily monitor the viral replication. The construction of a replicon system would  
57 accelerate the antiviral development.

58           SARS-CoV-2 belongs to the genus *betaoronavirus* of the family *coronaviridae* [6].  
59 The genome of coronaviruses is single-stranded RNA ranging from 27 to 32 kb, the largest of  
60 any other known RNA viruses. Its large genome size and the existence of bacteriotoxic  
61 elements hindered the generation of reverse genetic systems and replicon. Several strategies

62 have been adopted to overcome this obstacle: multiple plasmid system followed by *in vitro*  
63 DNA ligation or single bacterial artificial chromosome (BAC) plasmid system [7-9]. With  
64 these strategies, the infectious clones of SARS-CoV-2 and its reporter variants have been  
65 developed [10]. However, for now, SARS-CoV-2 replicon has not been reported elsewhere.  
66           Herein, we generated a first SARS-CoV-2 replicon by the *in vitro* ligation of PCR  
67 amplicons. The results demonstrated its use for antiviral screening without using the  
68 infectious SARS-CoV-2 virion.

## 69 **Results**

### 70 **The construction of a SARS-CoV-2 replicon**

71 We took an *in vitro* ligation strategy, similar to that used for constructing a SARS-  
72 CoV-2 infectious clone [10] (Figure 1A, B). The genome of replicon included viral non-  
73 structural proteins (encoded in open reading frame [ORF]1a and 1b) and N protein that were  
74 required for RNA replication. Meanwhile, the viral structural proteins (S, E, and M) were  
75 excluded so as not to produce infectious virion. For facilitating the detection of viral protein,  
76 HiBiT-tag was incorporated into the C-terminus of N protein. SARS-CoV-2 5' untranslated  
77 region (UTR), ORF1a, and 1b were separately amplified in the fragment 1 (F1) to F7. Then,  
78 N (including the closest transcription regulatory sequence [TRS] on 5' upstream:  
79 ACGAACAAACTAAA), HiBiT-tag, and 3'UTR were amplified in the F8. Each amplicon  
80 comprised the BsaI recognition sites at the both 5' and 3' termini. Figure 1C shows the  
81 detailed information of the fragments.

82 The viral RNA extracted from the culture fluid of SARS-CoV-2-infected Vero E6  
83 cell was used as a template for RT-PCR. Table 1 shows the primer sets used for the  
84 amplification of above-described eight fragments (Figure 1D). The fragments were  
85 assembled in a two-step ligation: (1) all the eight fragments were digested with BsaI,  
86 followed by the ligation of two adjacent fragments (e.g. F1 and F2 for F1–2) to produce four  
87 assembled fragments; (2) the ligated fragments were gel extracted and mixed, followed by a  
88 further ligation to construct the full-length replicon DNA. The size of the successfully ligated  
89 replicon DNA was 23.2 kb (Figure 1E). *In vitro* transcription using the replicon DNA  
90 produced multiple bands (Figure 1F). Of these bands, the highest band might represent the  
91 full-size replicon (indicated by arrow). Because the biggest size of RNA marker was only 8  
92 kb, the estimation of the size of RNA transcripts was not accurate.

93

## 94 **Characterization of a SARS-CoV-2 replicon**

95           The *in vitro* transcribed RNA was directly electroporated (without gel purification)  
96 into BHK-21, HEK-293T, or CHO-K1 cells to determine the most robust replicon system. In  
97 BHK-21 and 293T cells, luminescence signals were stable and similar to the MOCK control  
98 at two to six hours post-transfection (hpt) (Figure 2A). At 24–48 hpt, the signals increased to  
99 10–100 times. These data implied that the replicon was replicated but was not robust in these  
100 cell lines. Meanwhile in the CHO-K1 cell, the signals started to increase as early as 4–6 hpt,  
101 indicating replication and the subsequent translation of the replicon (Figure 2A). At 24–48  
102 hpt, the signals increased by more than 3,000 times than the MOCK control. Thus, the CHO-  
103 K1 cell was the most suitable cell line for the robust replication of the replicon, and used for  
104 the subsequent experiments. The viral N protein and NSP8 (a component of RNA replication  
105 complex encoded in ORF1a) expressions were confirmed by immunofluorescent assay (IFA)  
106 (Figure 2B, 2C). These data indicated that the replicon was successfully constructed and  
107 replicative.

108

## 109 **Antiviral evaluation**

110           Next, we tested if this RNA replicon could be used for drug screening. Remdesivir,  
111 an RdRp inhibitor effective for SARS-CoV-2, was used as a control compound. In total, 10  
112  $\mu\text{M}$  of remdesivir significantly inhibited the replication and subsequent translation of the  
113 replicon, whereas dimethyl sulfoxide (DMSO) control did not (Figure 3A). The 50%  
114 inhibitory concentration ( $\text{IC}_{50}$ ) and 50% cytotoxicity concentration ( $\text{CC}_{50}$ ) values were  
115 calculated to 0.29  $\mu\text{M}$  and more than 50  $\mu\text{M}$ , respectively (selectivity index [SI] >172.4)  
116 (Figure 3B). The  $\text{IC}_{50}$  value estimated using our replicon system was about 2.6 times lower  
117 than the previously reported  $\text{IC}_{50}$  (0.77  $\mu\text{M}$ ) [11]. A previous study infected Vero E6 with  
118 infectious SARS-CoV-2 in the presence of remdesivir, and quantified the virus released in the

119 supernatant by qRT-PCR at 48 hours post-infection [11]. The differences of our replicon  
120 assay and previous infectious SARS-CoV-2 assay including cell line (CHO or Vero),  
121 incubation time (24 h or 48 h), and action point of analysis (only RNA replication or whole  
122 replication steps) might cause the difference in  $IC_{50}$ . Indeed, the difference of the cell line  
123 caused different  $IC_{50}$  values of remdesivir [12]. Nevertheless, the result was generally  
124 consistent with the previous report, thus demonstrating that our replicon system could be used  
125 for antiviral screening.  
126

127 **Discussion**

128 SARS-CoV-2 is an emergent threat worldwide. A high throughput and safe antiviral  
129 screening system is urgently needed to identify the anti-SARS-CoV-2 compound, which has  
130 not yet been developed. Here, we firstly reported a SARS-CoV-2 replicon system with PCR  
131 amplicon-based strategy. The advantage of this system is its technical simplicity.  
132 Additionally, this system enabled us to produce a replicon without generating genetically  
133 modified *E. coli*. Thus, this system can be handled even in a BSL-1 laboratory. Furthermore,  
134 bacteriotoxic elements in the SARS-CoV-2 genome do not affect the construction of the  
135 replicon. However, the PCR-based strategy might be inferior to the plasmid-based strategy in  
136 terms of the yield of replicon RNA and usability of genome modification. Additionally, PCR-  
137 based replicon might contain the undesired mutations, which are undetectable by Sanger  
138 sequence. Nevertheless, this PCR-based replicon system offered an alternative way over  
139 plasmid-based replicon, especially in the resource-limited settings.

140 In this study, BHK-21, 293T, and CHO-K1 cells were used because these cell lines  
141 were used for the construction of coronavirus replicon and coronavirus protein expression  
142 [4,5]. However, only CHO-K1 supported the robust replication of the replicon. The  
143 electroporation efficacy of large-size RNA to BHK-21 and 293T might be lower than that to  
144 CHO-K1 by the electroporation method used in this study. Alternatively, the host factors in  
145 BHK-21 and 293T cells might be related to the restriction of SARS-CoV-2 replication.

146 We chose to fuse HiBiT-tag to the N protein because subgenomic mRNA encoding  
147 N was the most abundantly produced mRNA during the replication of coronavirus [13]. This  
148 study demonstrated that the insertion of HiBiT-tag at the C-terminus of N protein did not  
149 disrupt the RNA replication. This finding could be applied to the construction of HiBiT-  
150 tagged reporter infectious virus [14]. We had also tried to fuse HiBiT-tag at the N-terminus of  
151 N protein. The luminescence of the replicon with N-terminal HiBiT was 10 times lower than



152 that with C-terminal HiBiT at 24 hpt (supplementary Figure S1 and Table S1). The N protein  
153 is involved in not only nucleocapsid formation, but also RNA replication such as helicase  
154 activity and genome-length negative-strand RNA synthesis [15,16]. Although the N-terminus  
155 of N protein was not associated with either RNA binding or dimerization [17], the  
156 modification of the N-terminus might affect the replication efficacy.

157 This replicon system can be used not only for antiviral screening but also for the  
158 analysis of SARS-CoV-2 ORF1ab function in terms of RNA replication. SARS-CoV-1  
159 replicon was applied to the functional analysis of non-structural proteins encoded in ORF1  
160 [5]. Nowadays, several mutations have been observed in the replication complex regions  
161 because of worldwide pandemic [18]. For example, the virological meaning of ORF1ab  
162 4715L mutation positively correlated to a high fatality rate remains unknown [19]. This  
163 system would help to shed light on the enigmatic SARS-CoV-2 RNA replication mechanism.

164 The disadvantages of this system were that our replicon was a transient expression  
165 system, which was not a high throughput system. The cell line stably carrying the replicon  
166 gene needs to be established by inserting the antibiotic resistance gene such as puromycin N-  
167 acetyl-transferase into the replicon genome [4]. Additionally, our replicon lacks the structural  
168 genes including S, E, and M. Thus, this system cannot be used for the compounds acting on  
169 receptor binding, virus entry, encapsidation, and virus release. These targets could be covered  
170 by using a single-round infectious pseudo-type reporter virus usable in the BSL-2 laboratory  
171 [20].

172 In conclusion, we reported a first SARS-CoV-2 replicon that can be applied to  
173 antiviral screening without using infectious virion. This replicon system would accelerate the  
174 antiviral screening and help to identify the novel drug candidates for COVID-19.

175

## 176 **Materials and Methods**

### 177 **Virus and cell line**

178 A clinical SARS-CoV-2 isolate from Japan (JPN AI-I 004 strain; EPI\_ISL\_407084)  
179 was used for the construction of replicon. Baby hamster kidney-21 (BHK-21) cell (ATCC:  
180 CCL-10) was maintained in the Eagle's minimal essential medium (MEM) supplemented  
181 with 10% fetal bovine serum (FBS) at 37°C with 5% CO<sub>2</sub>. Chinese hamster ovary-K1 (CHO-  
182 K1) cell (ATCC: CCL-61) was maintained in MEM supplemented with 10% FBS, non-  
183 essential amino acids at 37°C with 5% CO<sub>2</sub>. HEK-293T cell (ATCC: CRL-3216) was  
184 maintained in the DMEM supplemented with 10% FBS.

185

### 186 **The construction of a SARS-CoV-2 replicon DNA**

187 The viral RNA extracted from the culture fluid of SARS-CoV-2-infected Vero E6  
188 cell (provided by the National Institute of Infectious Diseases, Japan) was reverse transcribed  
189 into cDNA by the SuperScript III First Strand Synthesis system (Thermo Fisher Scientific)  
190 with random hexamer primers. The fragments were amplified by primer sets (Table 1) and  
191 high-fidelity PCR with the Platinum SuperFi II DNA polymerase (Thermo Fisher Scientific).  
192 F8 was generated by the overlap PCR of F8A and F8B fragments to insert the HiBiT-tag at  
193 the C-terminus of N gene (Table 1). The overhang sequences after BsaI digestion were  
194 designed based on the ligase fidelity viewer program (available at the New England Biolabs  
195 website).

196 For assembly, all the fragments were digested with BsaI-HF v2 (New England  
197 Biolabs) and purified using NucleoSpin Gel and PCR clean-up (Macherey-Nagel). Then, two  
198 adjacent fragments of equimolar amount were mixed and ligated with 400 units of T4 DNA  
199 ligase (New England Biolabs) at 4°C overnight: F1 (1.45 µg) and F2 (1.56 µg) for F1–2, F3  
200 (0.86 µg) and F4 (0.85 µg) for F3–4, F5 (1.54 µg) and F6 (1.24 µg) for F5–6, and F7 (1.14

201  $\mu\text{g}$ ) and F8 (0.66  $\mu\text{g}$ ) for F7–8. The assembled fragments were electrophoresed on a 1%  
202 agarose gel and extracted using Monofas DNA extraction kit (GL Science). Then, extracted  
203 fragments were mixed and further assembled with 2,000 units of T4 DNA ligase at 4°C  
204 overnight. The assembled DNA was directly purified by phenol–chloroform–isoamyl alcohol  
205 (25:24:1), by chloroform, and isopropanol precipitate. The pelleted DNA was washed once  
206 with 70% ethanol, dried by air, and finally dissolved in 10  $\mu\text{l}$  of DEPC-treated water.

207

### 208 **RNA transcription, electroporation, and luminescence quantification**

209         The replicon RNA was transcribed by the mMMESSAGE mMACHINE T7  
210 Transcription Kit (Thermo Fisher Scientific) according to the manufacturer’s instruction with  
211 some modifications. Cap analog to GTP ratio was set to 1:1. About 1  $\mu\text{g}$  of the assembled  
212 DNA was subjected to RNA transcription. The reaction was incubated at 30°C overnight.  
213 After removing the DNA template following the manufacturer’s protocol, RNA was extracted  
214 by phenol–chloroform and isopropanol precipitated. The pelleted RNA was washed once  
215 with 70% ethanol, dried by air, and dissolved in 40  $\mu\text{l}$  of DEPC-treated water. The RNA was  
216 electrophoresed using DynaMarker RNA High for Easy Electrophoresis (BioDynamics  
217 Laboratory, Inc.) for the rough quality check.

218         The RNA was electroporated using NEPA21 electroporator (Nepagene). The cells  
219 were trypsinized and washed twice with Opti-MEM (Thermo Fisher Scientific). The washed  
220 cells ( $1 \times 10^6$  cells) were mixed with 5  $\mu\text{g}$  of replicon RNA in 100  $\mu\text{L}$  of Opti-MEM. Electric  
221 pulses were given by NEPA21. The parameters for BHK-21 and CHO-K1 cells were as  
222 follows: voltage = 145 V; pulse length = 5 ms; pulse interval = 50 ms; number of pulses = 1;  
223 decay rate = 10%; polarity + as poring pulse and voltage = 20 V; pulse length = 50 ms; pulse  
224 interval = 50 ms; number of pulses = 5; decay rate = 40%; and polarity +/- as transfer pulse.  
225 The parameters for 293T cell was same as above except voltage 150 V and pulse length of

226 2.5 ms for poring pulse. After electroporation, the cells were seeded as  $1.5 \times 10^4$  cells/well in  
227 a 96-well plate. At various time points post-transfection, the cells were lysed with 25  $\mu$ l of  
228 Nano-Glo HiBiT lytic detection system (Promega) plus 25  $\mu$ l of PBS. The luminescence  
229 signal was detected by CentroPRO LB962 (Berthold Technologies).

230

### 231 **Immunofluorescence assay**

232 At 24 hours post-transfection, the cells were fixed with 4% paraformaldehyde,  
233 followed by permeabilization with 0.5% Triton-X. After blocking with normal goat serum,  
234 the cells were incubated with primary mouse monoclonal antibodies (mAbs) (anti-N mAb  
235 [6H3: GeneTex] or anti-NSP8 mAb [5A10: GeneTex]) followed by a secondary antibody  
236 (goat anti-mouse IgG conjugated with Alexa Fluor 488). The cells were mounted in a  
237 mounting medium containing 4',6-diamidino-2-phenylindole (DAPI: Vector Laboratories).  
238 Fluorescence images were acquired by a fluorescence microscope.

239

### 240 **Antiviral treatment**

241 The CHO-K1 cells electroporated with 5  $\mu$ g of the replicon RNA were seeded as  $1.5$   
242  $\times 10^4$  cells/well in a 96-well plate. The cells were immediately treated with various  
243 concentrations of remdesivir. The cells were also treated with 0.2% DMSO as a negative  
244 control because 10- $\mu$ M remdesivir contains 0.2% DMSO. At 24 hours post-treatment, the  
245 luminescence signal was detected as described above. Cell viability was measured by WST-1  
246 assay following manufacture's protocol (Roche). The  $IC_{50}$  and  $CC_{50}$  were calculated using a  
247 four-parameter logistic regression model from the GraphPad Prism 5 software (GraphPad  
248 Software Inc.).

249

250 **Acknowledgment**

251           This work was supported by a young scientist dispatch program, Kobe University:  
252 by a subsidy for post-corona society realization, Hyogo prefecture, and by Japan Agency for  
253 Medical Research and Development (AMED) under Grant Number JP20he082206. The  
254 manuscript was proofread by Enago. We thank Ms. Honoka Yoneda for her technical  
255 assistance. We also thank Dr. Masayuki Saijo of the National Institute of Infectious Diseases  
256 for providing RNA of SARS-CoV-2 JPN AI/I 004 strain.

257

258 **Competing interests**

259           The authors declare that they have no competing interests.

260

261 **Author contributions**

262           T.K. and M.K. conceived the study. T.K. performed the experiments and took the lead  
263 in writing the manuscript. X.X., P. Y.-S., and M.K. provided feedback and helped shape the  
264 research and manuscript.

265

266 **References**

- 267 1. Guan, W. J. *et al.* Clinical characteristics of coronavirus disease 2019 in China. *N. Engl. J.*  
268 *Med.* **382**, 1708-1720 (2020). <https://doi.org/10.1056/NEJMoa2002032>,  
269 Pubmed:[32109013](https://pubmed.ncbi.nlm.nih.gov/32109013/)
- 270 2. Wang, Y. *et al.* Remdesivir in adults with severe COVID-19: A randomised, double-blind,  
271 placebo-controlled, multicentre trial. *Lancet* **395**, 1569–1578 (2020).  
272 [https://doi.org/10.1016/S0140-6736\(20\)31022-9](https://doi.org/10.1016/S0140-6736(20)31022-9), Pubmed:[32423584](https://pubmed.ncbi.nlm.nih.gov/32423584/)
- 273 3. Wang, C., Horby, P. W., Hayden, F. G. & Gao, G. F. A novel coronavirus outbreak of  
274 global health concern. *Lancet* **395**, 470–473 (2020). [https://doi.org/10.1016/S0140-](https://doi.org/10.1016/S0140-6736(20)30185-9)  
275 [6736\(20\)30185-9](https://doi.org/10.1016/S0140-6736(20)30185-9)
- 276 4. Ge, F., Luo, Y., Liew, P. X. & Hung, E. Derivation of a novel SARS-coronavirus replicon  
277 cell line and its application for anti-SARS drug screening. *Virology* **360**, 150-158 (2007).  
278 <https://doi.org/10.1016/j.virol.2006.10.016>, Pubmed:[17098272](https://pubmed.ncbi.nlm.nih.gov/17098272/)
- 279 5. Wang, J. M., Wang, L. F. & Shi, Z. L. Construction of a non-infectious SARS  
280 coronavirus replicon for application in drug screening and analysis of viral protein  
281 function. *Biochem. Biophys. Res. Commun.* **374**, 138-142 (2008).  
282 <https://doi.org/10.1016/j.bbrc.2008.06.129>, Pubmed:[18619943](https://pubmed.ncbi.nlm.nih.gov/18619943/)
- 283 6. Hartenian, E. *et al.* The molecular virology of coronaviruses. *J. Biol. Chem.* (2020).  
284 Online ahead of print. <https://doi.org/10.1074/jbc.REV120.013930>, Pubmed:[32661197](https://pubmed.ncbi.nlm.nih.gov/32661197/)
- 285 7. Yount, B., *et al.* Reverse genetics with a full-length infectious cDNA of severe acute  
286 respiratory syndrome coronavirus. *Proc. Natl Acad. Sci. U.S.A.* **100**, 12995–13000 (2003).  
287 <https://doi.org/10.1073/pnas.1735582100>, Pubmed:[14569023](https://pubmed.ncbi.nlm.nih.gov/14569023/)
- 288 8. Almazán, F. *et al.* Construction of a severe acute respiratory syndrome coronavirus  
289 infectious cDNA clone and a replicon to study coronavirus RNA synthesis. *J. Virol.* **80**,  
290 10900-10906 (2006). [HTTPS://doi.org/10.1128/JVI.00385-06](https://doi.org/10.1128/JVI.00385-06), Pubmed:[16928748](https://pubmed.ncbi.nlm.nih.gov/16928748/)

- 291 9. Scobey, T. *et al.* Reverse genetics with a full-length infectious cDNA of the Middle East  
292 respiratory syndrome coronavirus. *Proc. Natl Acad. Sci. U.S.A.* **110**, 16157–16162 (2013).  
293 <https://doi.org/10.1073/pnas.1311542110>, Pubmed:[24043791](https://pubmed.ncbi.nlm.nih.gov/24043791/)
- 294 10. Xie, X. *et al.* An infectious cDNA clone of SARS-CoV-2. *Cell Host Microbe* **27**, 841–  
295 848.e3 (2020). <https://doi.org/10.1016/j.chom.2020.04.004>, Pubmed:[32289263](https://pubmed.ncbi.nlm.nih.gov/32289263/)
- 296 11. Wang, M. *et al.* Remdesivir and chloroquine effectively inhibit the recently emerged  
297 novel coronavirus (2019-nCoV) in vitro. *Cell Res.* **30**, 269-271 (2020).  
298 <https://doi.org/10.1038/s41422-020-0282-0>, Pubmed:[32020029](https://pubmed.ncbi.nlm.nih.gov/32020029/)
- 299 12. Xie, X. *et al.* A nanoluciferase SARS-CoV-2 for rapid neutralization testing and  
300 screening of anti-infective drugs for COVID-19. *bioRxiv* (2020).  
301 <https://doi.org/10.1101/2020.06.22.165712>, Pubmed:[32607511](https://pubmed.ncbi.nlm.nih.gov/32607511/)
- 302 13. Hiscox, J. A., Cavanagh, D. & Britton, P. Quantification of individual subgenomic  
303 mRNA species during replication of the coronavirus transmissible gastroenteritis virus.  
304 *Virus Res.* **36**, 119–130 (1995). [https://doi.org/10.1016/0168-1702\(94\)00108-o](https://doi.org/10.1016/0168-1702(94)00108-o),  
305 Pubmed:[7653093](https://pubmed.ncbi.nlm.nih.gov/7653093/)
- 306 14. Tamura, T. *et al.* In vivo dynamics of reporter Flaviviridae viruses. *J. Virol.* **93**, e01191-  
307 19 (2019). [HTTPS://doi.org/10.1128/JVI.01191-19](https://doi.org/10.1128/JVI.01191-19), Pubmed:[31462560](https://pubmed.ncbi.nlm.nih.gov/31462560/)
- 308 15. Schelle, B. *et al.* Selective replication of coronavirus genomes that express nucleocapsid  
309 protein. *J. Virol.* **79**, 6620–6630 (2005). [HTTPS://doi.org/10.1128/JVI.79.11.6620-](https://doi.org/10.1128/JVI.79.11.6620-6630.2005)  
310 [6630.2005](https://doi.org/10.1128/JVI.79.11.6620-6630.2005), Pubmed:[15890900](https://pubmed.ncbi.nlm.nih.gov/15890900/)
- 311 16. Grosseohme, N. E. *et al.* Coronavirus N protein N-terminal domain (NTD) specifically  
312 binds the transcriptional regulatory sequence (TRS) and melts TRS-cTRS RNA duplexes.  
313 *J. Mol. Biol.* **394**, 544-557 (2009). <https://doi.org/10.1016/j.jmb.2009.09.040>,  
314 Pubmed:[19782089](https://pubmed.ncbi.nlm.nih.gov/19782089/)

- 315 17. Chang, C. K. *et al.* Modular organization of SARS coronavirus nucleocapsid protein. *J.*  
316 *Biomed. Sci.* **13**, 59-72 (2006). <https://doi.org/10.1007/s11373-005-9035-9>,  
317 Pubmed:[16228284](https://pubmed.ncbi.nlm.nih.gov/16228284/)
- 318 18. Pachetti, M. *et al.* Emerging SARS-CoV-2 mutation hot spots include a novel RNA-  
319 dependent-RNA polymerase variant. *J. Transl. Med.* **18**, 179 (2020).  
320 <https://doi.org/10.1186/s12967-020-02344-6>, Pubmed:[32321524](https://pubmed.ncbi.nlm.nih.gov/32321524/)
- 321 19. Toyoshima, Y. *et al.* SARS-CoV-2 genomic variations associated with mortality rate of  
322 COVID-19. *J. Hum. Genet.*, 1-8 (2020). <https://doi.org/10.1038/s10038-020-0808-9>,  
323 Pubmed:[32699345](https://pubmed.ncbi.nlm.nih.gov/32699345/)
- 324 20. Ozono, S. *et al.* Naturally Mutated Spike Proteins of SARS-CoV-2 Variants Show  
325 Differential Levels of Cell Entry. Preprint. <https://doi.org/10.1101/2020.06.15.151779>  
326 (2020)  
327



328 **Table 1. Primer list**

| Name           | Sequence                                                                   | Description                                                |
|----------------|----------------------------------------------------------------------------|------------------------------------------------------------|
| F1<br>Forward  | 5'-<br>AACGGTCTCATGATTAATACGACTCACTATAGATTA<br>AAGGTTTATACCTTCCCAGGTAAC-3' | For F1:<br>Encoding T7<br>promoter,<br>5'UTR, and<br>ORF1a |
| F1<br>Reverse  | 5'-<br>AACGGTCTCAGCCGACAACATGAAGACAGTGTTTAG<br>C-3'                        |                                                            |
| F2<br>Forward  | 5'-AACGGTCTCACGGCCCAAATGTTAACAAGGTG-3'                                     | For F2:<br>Encoding<br>ORF1a                               |
| F2<br>Reverse  | 5'-<br>AACGGTCTCAGTTTGTAACACATCATACAAGTTGAT<br>G-3'                        |                                                            |
| F3<br>Forward  | 5'-<br>AACGGTCTCAAAACGTAATAGAGCAACAAGAGTCGA<br>ATG-3'                      | For F3:<br>Encoding<br>ORF1a                               |
| F3<br>Reverse  | 5'-<br>ACCGGTCTCATGTGAACATAACCATCCACTGAATAT<br>GTGC-3'                     |                                                            |
| F4<br>Forward  | 5'-<br>ACCGGTCTCACACACCTTTAGTACCTTTCTGGATAAC<br>-3'                        | For F4:<br>Encoding<br>ORF1a                               |
| F4<br>Reverse  | 5'-<br>ACCGGTCTCAAAGGCATCTATGCTATTCTTGGGTGGG<br>-3'                        |                                                            |
| F5<br>Forward  | 5'-<br>ACCGGTCTCACCTTCAAACCTCAACATTAATTGTTGG<br>G-3'                       | For F5:<br>Encoding<br>ORF1a and 1b                        |
| F5<br>Reverse  | 5'-<br>ACCGGTCTCAACTCATAAAGTCTGTGTTGTAAATTGC<br>GG-3'                      |                                                            |
| F6<br>Forward  | 5'-<br>ACCGGTCTCAGAGTGTCTCTATAGAAATAGAGATGT<br>TGAC-3'                     | For F6:<br>Encoding<br>ORF1b                               |
| F6<br>Reverse  | 5'-<br>ACCGGTCTCATAAGTGTCTGAAGCAGTGGAAAAGCA<br>TG-3'                       |                                                            |
| F7<br>Forward  | 5'-<br>ACCGGTCTCACTTATGCCTGTTGGCATCATTCTATTG<br>G-3'                       | For F7:<br>Encoding<br>ORF1b                               |
| F7<br>Reverse  | 5'-<br>ACCGGTCTCATCGTTTAGTTGTTAACAAGAACATCAC<br>TAG-3'                     |                                                            |
| F8A<br>Forward | 5'-<br>ACCGGTCTCAACGAACAACTAAAATGTCTGATAAT<br>GGACCCC-3'                   | For F8A:<br>Encoding N<br>and a part of                    |

|                |                                                                                          |                                                                       |
|----------------|------------------------------------------------------------------------------------------|-----------------------------------------------------------------------|
| F8A<br>Reverse | 5'-<br><u>TTAAGAAATCTTCTTGAACAGCCGCCAGCCGCTCAC</u><br><u>GGCCTGAGTTGAGTCAGCACTGC</u> -3' | HiBiT-tag                                                             |
| F8B<br>Forward | 5'-<br><u>GGCTGTTCAAGAAGATTCTTAAACTCATGCAGACC</u><br><u>ACACAAGGC</u> -3'                | For F8A:<br>Encoding a<br>part of HiBiT-<br>tag, 3'UTR,<br>and poly A |
| F8B<br>Reverse | 5'-<br><u>ACCGGTCTCATTTTTTTTTTTTTTTTTTTTTTTTTT</u><br><u>TTTTTGTCATTCTCCTAAGAAGC</u> -3' |                                                                       |

329

330 Underline: BsaI recognition site. Double underline: T7 promoter sequence. Wavy underline:

331 HiBiT sequence. Dotted underline: poly A sequence.

332 \*F8A and F8B fragments shall be merged by overlap PCR using F8A Forward and F8B

333 Reverse primers to produce F8 fragment.

334

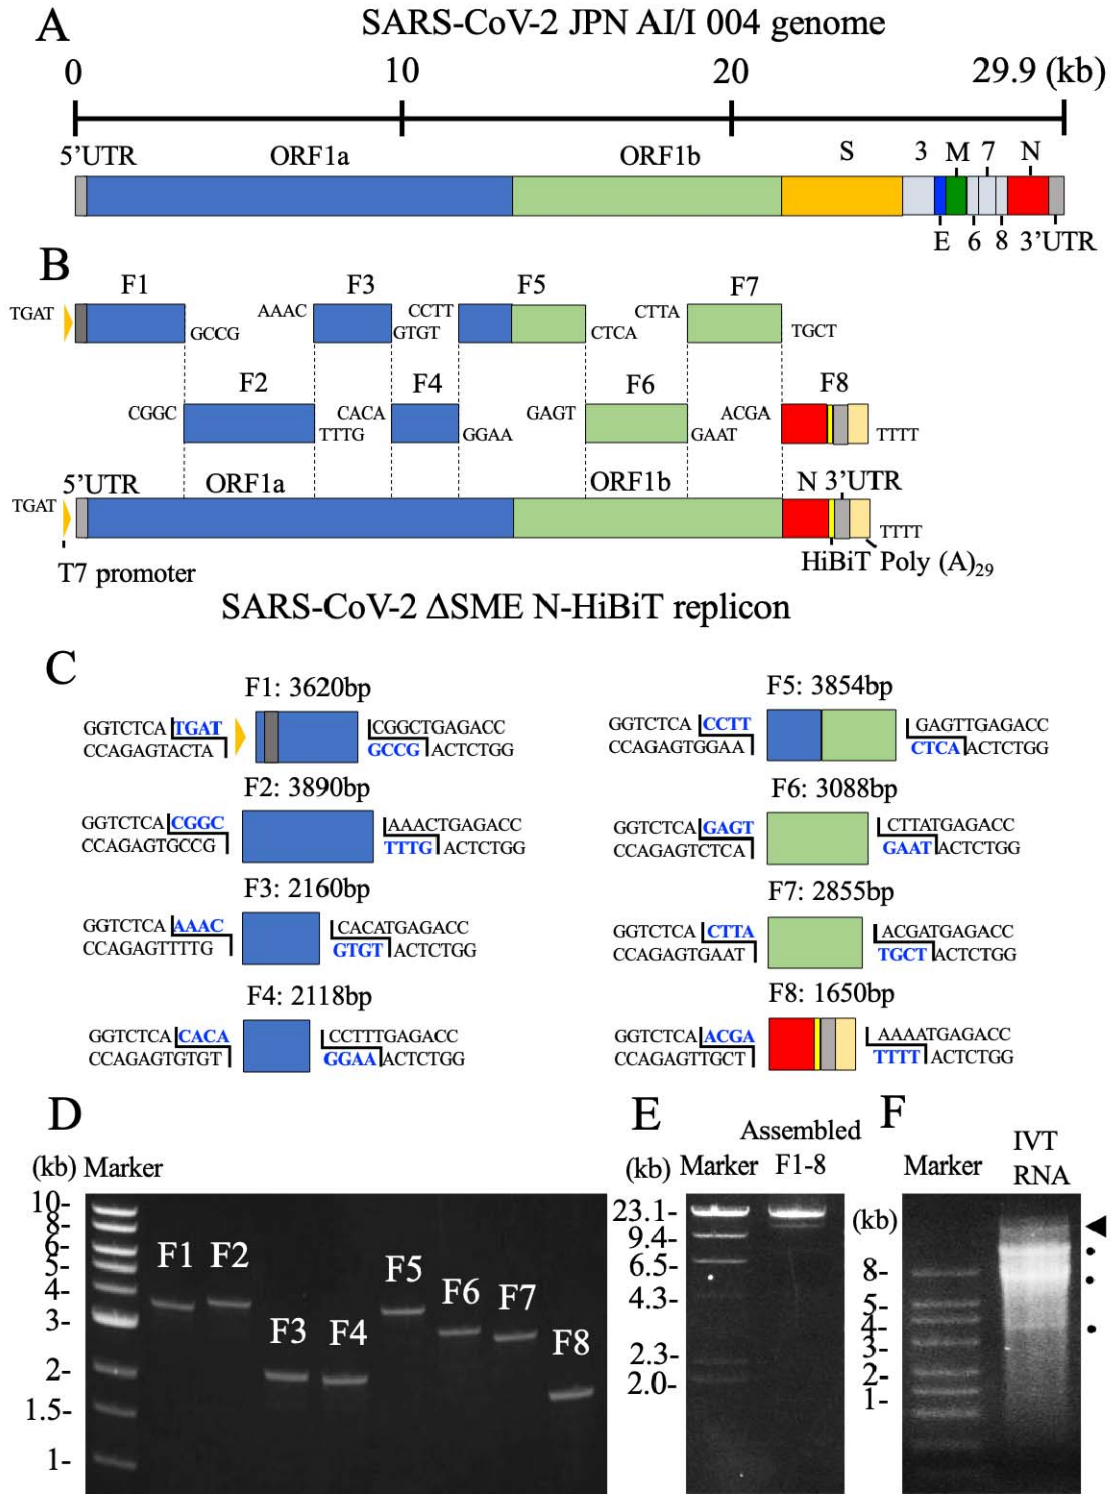

335

336 **Figure 1. Construction of a SARS-CoV-2 replicon.**

337 (A) Genome structure of SARS-CoV-2. The untranslated regions (UTRs), open reading

338 frames (ORFs), and structural proteins (S, E, M, and N) are indicated in this figure.

339 (B) Strategy for the *in vitro* assembly of a SARS-CoV-2 replicon DNA. The nucleotide  
340 sequences of the overhang are indicated in this figure. The replicon DNA was assembled  
341 using *in vitro* ligation.

342 (C) Detailed terminal sequences of each DNA fragment. Both 5' and 3' terminal sequences  
343 were recognized by BsaI. The overhang sequences were shown in blue.

344 (D) Electrophoresis of the eight DNA fragments. Eight purified DNA fragments (about 100  
345 ng) were run on a 1.0% agarose gel. The 1-kb DNA ladders are indicated in this figure.

346 (E) Electrophoresis of an assembled DNA. About 200 ng of assembled DNA was run on a  
347 1% agarose gel. The  $\lambda$ -HindIII digest marker is indicated in this figure. Successfully  
348 assembled replicon DNA was 23.2kb.

349 (F) Electrophoresis of RNA transcripts. About 1  $\mu$ g of *in vitro* transcribed (IVT) RNAs were  
350 run under denaturing conditions. RNA ladders are indicated in this figure. The triangle  
351 indicates the genome-length RNA transcript (23kb), whereas the circles show the shorter  
352 RNA transcripts. Because the biggest size of RNA marker was 8 kb, the estimation of the size  
353 of RNA transcripts was not accurate.

354

355

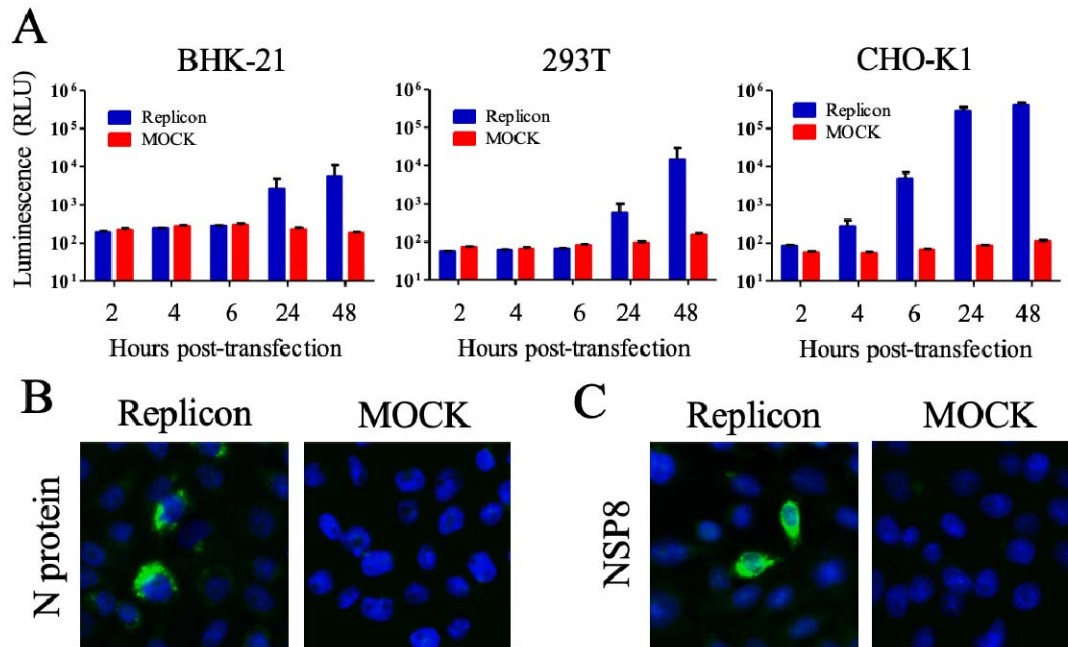

356

357 **Figure 2. Characterization of a SARS-CoV-2 replicon.**

358 (A) Kinetics of luminescence signal. Three cell lines were electroporated with 5  $\mu$ g of  
359 replicon RNA. Intracellular luminescence signals were measured at the indicated time  
360 points. The mean and standard error of two independent experiments are shown in this  
361 figure.

362 (B) The detection of N protein by IFA. The CHO-K1 cell was electroporated with 5  $\mu$ g of  
363 replicon RNA. The cells were fixed with 4% paraformaldehyde, followed by  
364 permeabilization with 0.5% Triton-X. The expression of N protein was detected using  
365 anti-N mAb and goat-anti-mouse IgG conjugated with Alexa Fluor 488. Nucleus was  
366 stained by DAPI.

367 (C) The detection of NSP8 protein by IFA. The expression of NSP8 protein was detected  
368 using anti-NSP8 mAb and goat-anti-mouse IgG conjugated with Alexa Fluor 488.

369

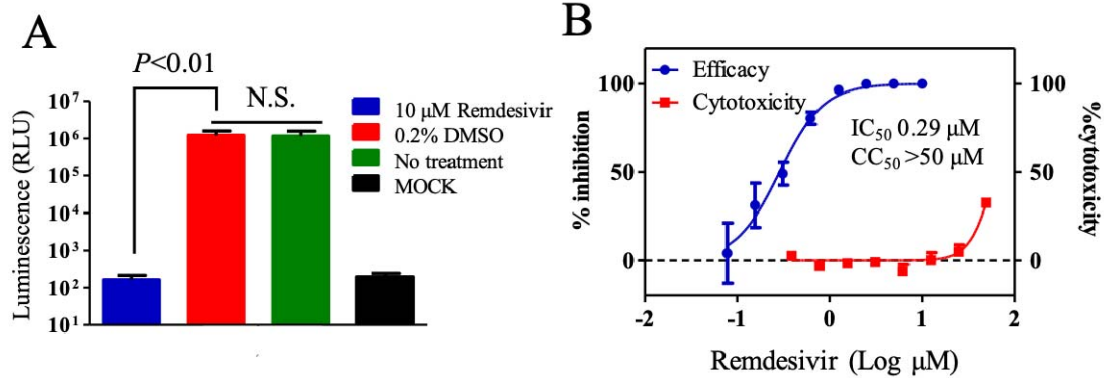

370

371

**Figure 3. Antiviral evaluation using SARS-CoV-2 replicon.**

372

(A) Antiviral activity of remdesivir. The CHO-K1 cells electroporated with 5  $\mu$ g of replicon

373

RNA were seeded in a 96-well plate. The cells were treated immediately with 10- $\mu$ M

374

remdesivir or 0.2% DMSO. Luminescence was measured at 24 hours post-treatment. The

375

mean and standard error of two independent experiments are shown in this figure. A one-

376

way ANOVA was performed to determine the statistical significance. A *p*-value less than

377

0.05 was considered to be statistically significant. N.S., not significant.

378

(B) Calculation of IC<sub>50</sub> and CC<sub>50</sub>. The CHO-K1 cells electroporated with replicon RNA was

379

seeded. The cells were immediately treated with remdesivir at indicated concentrations.

380

Luminescence and cell viability were measured at 24 hours post-treatment. IC<sub>50</sub> and CC<sub>50</sub>

381

values were calculated by GraphPad software. The mean and standard error of two

382

independent experiments are shown in this figure.

383

384 **Supplementary Table S1. Primer sets for constructing a SARS-CoV-2 replicon with**  
385 **HiBiT-tag at the N-terminus of N protein\*.**

386

| Name                  | Sequence                                                                                     | Description                                                             |
|-----------------------|----------------------------------------------------------------------------------------------|-------------------------------------------------------------------------|
| F7 HiBiT-N<br>Forward | 5'-<br><u>ACCGGTCTCACTTATGCCTGTTGGCATCATTCTATT</u><br>GG -3'                                 | For F7 HiBiT-<br>N:<br>Encoding<br>ORF1b and a<br>part of HiBiT-<br>tag |
| F7 HiBiT-N<br>Reverse | 5'-<br><u>ACCGGTCTCAAGCCGCTCACCATTTTAGTTTGTTT</u><br><u>GTTTAGTTGTTAACAAGAACATCAC</u> -3'    |                                                                         |
| F8 HiBiT-N<br>Forward | 5'-<br><u>ACCGGTCTCAGGCTGGCGGCTGTTCAAGAAGATT</u><br><u>CTGATAATGGACCCCAAATCAGCG</u> -3'      | For F8 HiBiT-<br>N :<br>Encoding a<br>part of HiBiT-<br>tag and N       |
| F8 HiBiT-N<br>Reverse | 5'-<br><u>ACCGGTCTCATTTTTTTTTTTTTTTTTTTTTTTTTTTT</u><br><u>TTTTTTTGTCATTCTCCTAAGAAGC</u> -3' |                                                                         |

387

388 Underline: BsaI recognition site. Wavy underline: HiBiT sequence. Dotted underline: poly A

389 sequence.

390 \*Primers for amplifying F1-F6 are identical to the sets shown in Table 1.

391

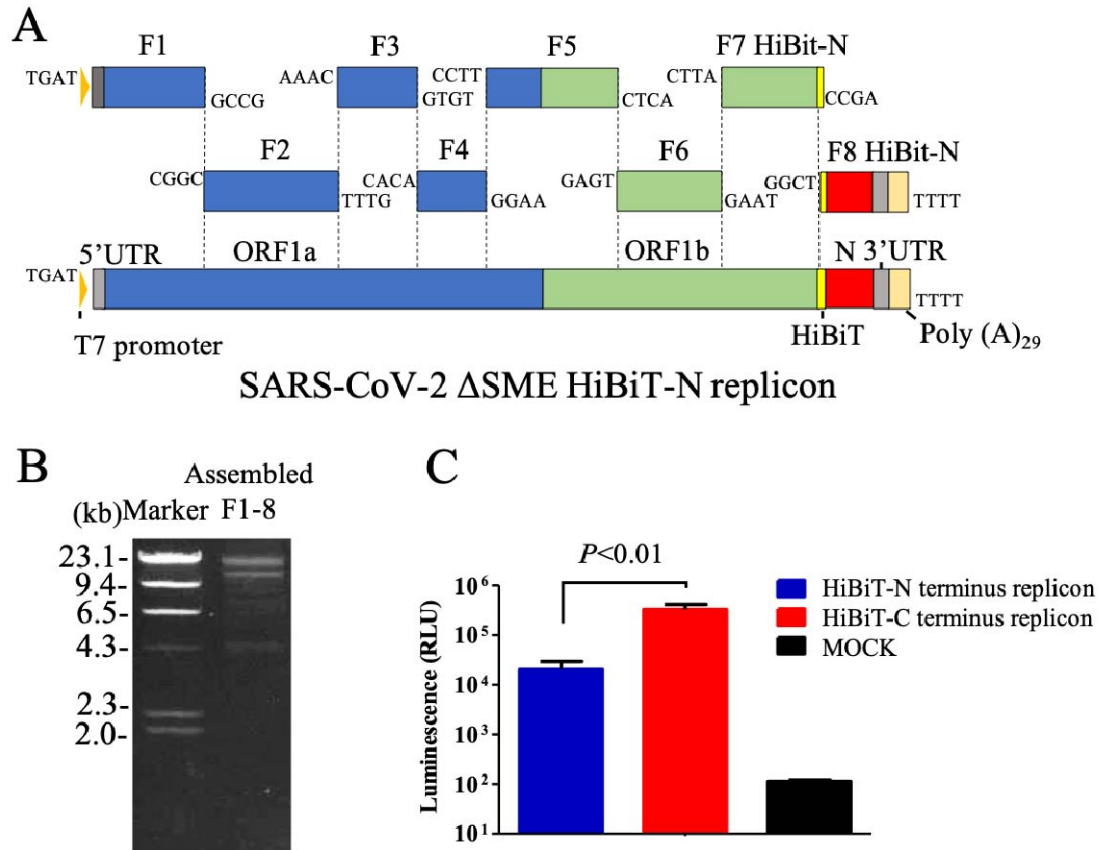

392

393 **Supplementary Figure S1. Construction and characterization of a SARS-CoV-2**

394 **replicon with HiBiT-tag at the N-terminus of N protein.**

395 (A) Strategy for *in vitro* assembly of a SARS-CoV-2 replicon DNA with HiBiT-tag at the N-

396 terminus of N protein. The nucleotide sequences of the overhang are indicated in this figure.

397 The replicon DNA was assembled using *in vitro* ligation.

398 (B) Electrophoresis of an assembled DNA. About 100 ng of assembled DNA was run on a

399 1% agarose gel. The  $\lambda$ -HindIII digest marker is indicated in this figure. Successfully

400 assembled replicon DNA was 23.2 kb.

401 (C) Luminescence signals at 24 hpt. CHO-K1 cell was electroporated with 5  $\mu$ g of replicon

402 RNAs. Intracellular luminescence signals were measured at 24 hpt. The mean and standard



403 error of two independent experiments are shown in this figure. A t test was performed to

404 determine the statistical significance.

405
